# Supplementary material
Source: PubMed Central journal article supplement (PMC2831705)
Supplement: 091080_1.pdf [file 091080_1.pdf]

## Appendix 1 (as supplied by the authors): Literature search

**Table 1:** Search terms used to search the electronic databases.

| Search terms |                         |
|--------------|-------------------------|
| 1            | Helmet                  |
| 2            | Helmet use              |
| 3            | Head injury             |
| 4            | Head trauma             |
| 5            | Skiing                  |
| 6            | Snowboarding            |
| 7            | Head protective devices |
| 8            | Craniocerebral trauma   |

**Table 2:** Results of literature search and study inclusion.

| Database                                                                                            | Search terms                                                               | Number of hits | Number of potentially relevant | Number selected (additional to previous searches) |
|-----------------------------------------------------------------------------------------------------|----------------------------------------------------------------------------|----------------|--------------------------------|---------------------------------------------------|
| MEDLINE (1950 to November 2008)                                                                     | 7 OR 8 AND (5 OR 6)                                                        | 45             | 14                             | 5                                                 |
| Academic Search Complete (1948 to November 2008)                                                    | (1 OR 2) AND (3 OR 4) AND (5 OR 6)                                         | 47             | 17                             | 0                                                 |
| SPORTDiscus (1982 to November 2008)                                                                 | (1 OR 2) AND (3 OR 4) AND (5 OR 6)                                         | 19             | 8                              | 0                                                 |
| EMBASE (1980 to November 2008)                                                                      | 1 AND 3 AND (5 OR 6)                                                       | 28             | 9                              | 0                                                 |
| PubMED (1948 to November 2008)                                                                      | (1 OR 2) AND (3 OR 4) AND (5 OR 6)                                         | 43             | 14                             | 0                                                 |
| International Society of Skiing Safety Conference (1 <sup>st</sup> to 16 <sup>th</sup> conferences) | NA                                                                         | NA             | 7                              | 4                                                 |
| SafetyLit                                                                                           | 5<br>6                                                                     | 116<br>73      | 12<br>10                       | 0<br>0                                            |
| Grey literature search (Proquest, UofC database search, prior knowledge of studies)                 | 5 OR 6 (Proquest)<br>(1 OR 2) AND (3 OR 4) AND (5 OR 6)<br>(UofC database) | 203            | 23                             | 3                                                 |
| Cochrane Central Register of Controlled Trials                                                      | (5 OR 6) AND 1                                                             | 1              | 0                              | 0                                                 |
| Cochrane Database of Systematic Reviews                                                             | (5 OR 6)                                                                   | 0              | 0                              | 0                                                 |
| Database of Abstracts of Reviews of Effects                                                         | (5 OR 6)                                                                   | 1              | 0                              | 0                                                 |
| Reference list of included studies                                                                  | NA                                                                         | NA             |                                |                                                   |
| Total unique studies                                                                                |                                                                            |                | 36                             | 12                                                |
